# Supplementary material for: Embedding catalytic nanoparticles inside mesoporous structures with controlled porosity: Au@TiO2
Source: Royal Society of Chemistry journal article supplement (doi:10.1039/c3ta13346j), 2013-01-01
Supplement: c3ta13346j.pdf [file c3ta13346j.pdf]

# Embedding catalytic nanoparticles inside mesoporous structures with controlled porosity: Au@TiO<sub>2</sub>

## Electronic Supplementary Information

Raquel Nafria,<sup>a</sup> Pilar Ramírez de la Piscina,<sup>b</sup> Narcís Homs,<sup>a,b</sup> Joan Ramon Morante,<sup>a,c</sup> Andreu Cabot,<sup>\*,a,c</sup> Urbano Diaz,<sup>d</sup> Avelino Corma<sup>\*,d</sup>

<sup>a</sup> Catalonia Institute for Energy Research, IREC, Sant Adrià del Besos, Barcelona, 08930, Spain

<sup>b</sup> Departament de Química Inorgànica, Universitat de Barcelona, Barcelona, 08028, Spain

<sup>c</sup> Departament d'Electrònica, Universitat de Barcelona, Barcelona, 08028, Spain

<sup>d</sup> Instituto de Tecnología Química (UPV-CSIC), Universidad Politécnica de Valencia, Avenida de los Naranjos s/n 46022 Valencia, Spain

\* Emails: acabot@irec.cat ; acorma@itq.upv.es

**Table SII.** Textural properties of inorganic-organic hybrid materials (before calcination).

| As-prepared             | Surface area (m <sup>2</sup> /g) |                    |                   | Pore volume (cm <sup>3</sup> /g) |                        |
|-------------------------|----------------------------------|--------------------|-------------------|----------------------------------|------------------------|
|                         | <i>S<sub>BET</sub></i>           | <i>Microporous</i> | <i>Mesoporous</i> | <i>V<sub>tot</sub></i>           | <i>VB<sub>JH</sub></i> |
| TiO <sub>2</sub>        | 552                              | 496                | 56                | 0.34                             |                        |
| TiO <sub>2</sub> (t)    | 226                              | 103                | 123               | 0.86                             | 0.82                   |
| TiO <sub>2</sub> (n)    | 176                              | 75                 | 101               | 0.61                             | 0.59                   |
| TiO <sub>2</sub> (b)    | 341                              | 140                | 201               | 1.21                             | 1.22                   |
| Au@TiO <sub>2</sub>     | 349                              | 10                 | 254               | 0.32                             | 0.27                   |
| Au@TiO <sub>2</sub> (t) | 293                              | 87                 | 206               | 1.86                             | 1.83                   |
| Au@TiO <sub>2</sub> (n) | 183                              | 36                 | 147               | 0.76                             | 0.75                   |
| Au@TiO <sub>2</sub> (b) | 341                              | 75                 | 239               | 1.32                             | 1.21                   |

**Table SI2.** Textural properties of the calcined material.

| Calcined                | Surface area (m <sup>2</sup> /g) |                    |                   | Pore volume (cm <sup>3</sup> /g) |                        |
|-------------------------|----------------------------------|--------------------|-------------------|----------------------------------|------------------------|
|                         | <i>S<sub>BET</sub></i>           | <i>Microporous</i> | <i>Mesoporous</i> | <i>V<sub>tot</sub></i>           | <i>VB<sub>JH</sub></i> |
| TiO <sub>2</sub>        | 64                               | 64                 | -                 | 0.11                             |                        |
| TiO <sub>2</sub> (t)    | 85                               | 42                 | 43                | 0.37                             | 0.39                   |
| TiO <sub>2</sub> (n)    | 153                              | 47                 | 106               | 0.59                             | 0.56                   |
| TiO <sub>2</sub> (b)    | 180                              | 54                 | 126               | 0.84                             | 0.82                   |
| Au@TiO <sub>2</sub>     | 89                               | 8                  | 81                | 0.16                             | 0.16                   |
| Au@TiO <sub>2</sub> (t) | 109                              | 12                 | 97                | 0.57                             | 0.59                   |
| Au@TiO <sub>2</sub> (n) | 178                              | 44                 | 134               | 0.74                             | 0.72                   |
| Au@TiO <sub>2</sub> (b) | 145                              | 53                 | 91                | 0.82                             | 0.80                   |

**Table SI3 .** ICP Au content (% wt) of the calcined materials.

| Sample name             | [Au] |
|-------------------------|------|
| Au@TiO <sub>2</sub>     | 0.50 |
| Au@TiO <sub>2</sub> (t) | 1.08 |
| Au@TiO <sub>2</sub> (n) | 0.91 |
| Au@TiO <sub>2</sub> (b) | 0.95 |
| Au/TiO <sub>2</sub> (b) | 1.48 |

### X-ray photoelectron spectroscopy analysis

X-ray photoelectron spectroscopy (XPS) analysis was used to characterize the surface composition and chemical state of Au@TiO<sub>2</sub> materials (Figure SI1). XPS was performed with a PHI 5500 Multitechnique System, using a monochromatic Al K $\alpha$  X-ray source (1486.6 eV, 350 W) which was placed perpendicular to the analyzer. Acquisition time was 2 min for the C 1s, Ti 2p and O1s regions and 60 min for Au 4f. The binding energy scale was corrected for surface charging by taking the C 1s peak of contaminant carbon as a reference at 284.8 eV

From the XPS analysis the Au/Ti ratio was calculated to be on the order of  $1 \times 10^{-4}$ , pointing out the embedment of gold within the TiO<sub>2</sub> matrix

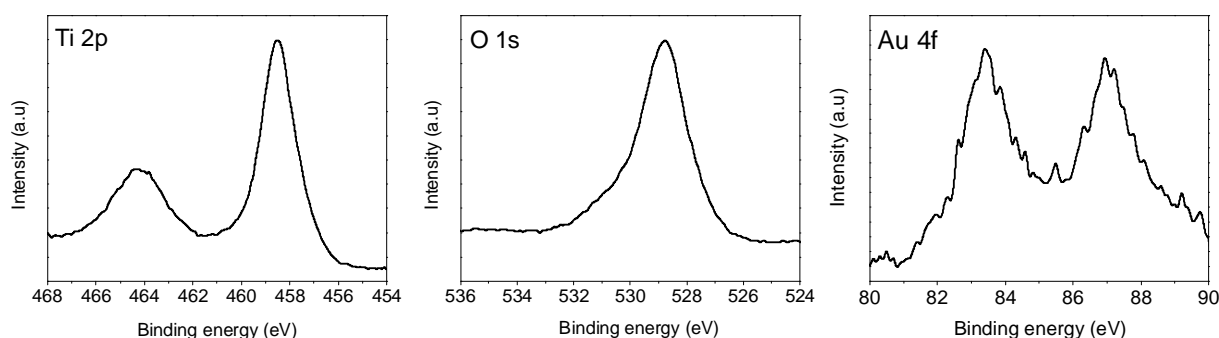

**Figure SI1.** XPS spectrum of Au@TiO<sub>2</sub>(b)

### Thermogravimetry analysis

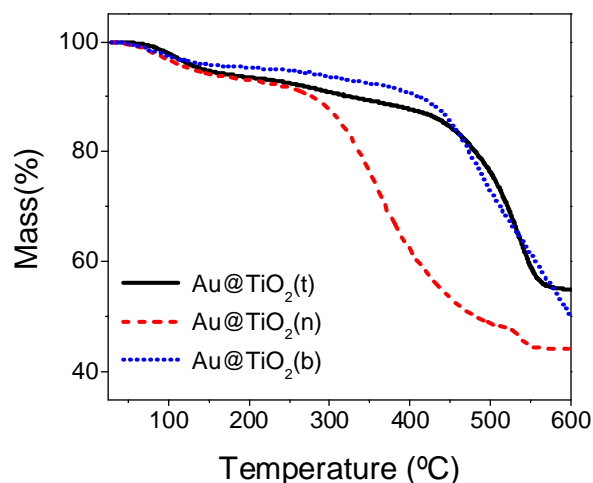

**Figure SI2.** Thermogravimetric profile of the Au@TiO<sub>2</sub> mesoporous materials.

### Scanning electron microscopy (SEM)

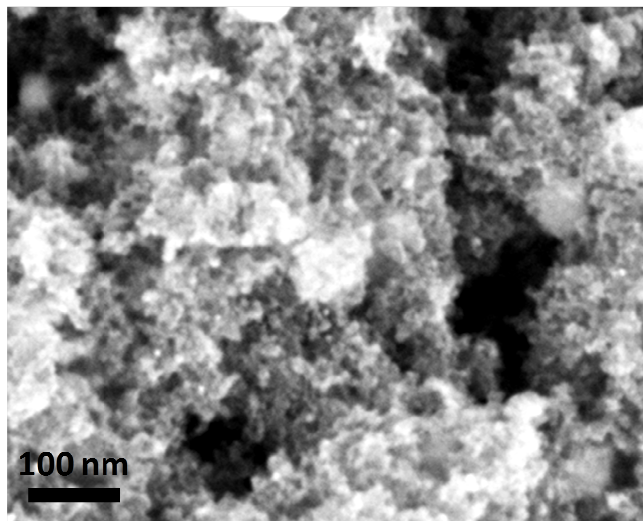

**Figure SI3.** SEM micrograph of the Au@TiO<sub>2</sub> (b) mesoporous materials.

### Selected Area Electron Diffraction pattern

The gold crystallographic planes (002) and (222) were detected by electron diffraction inside the TEM.

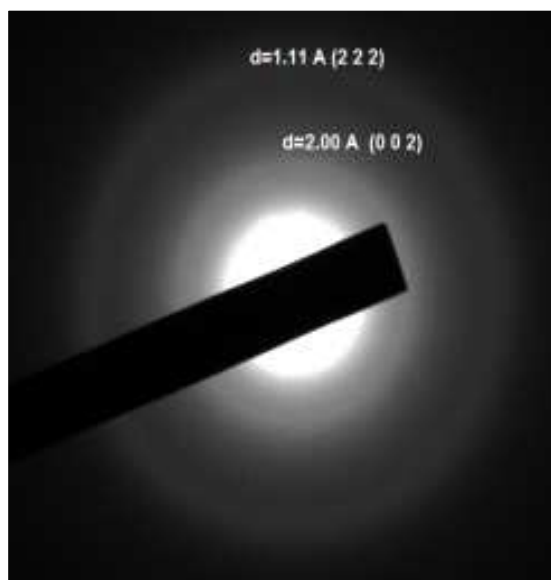

**Figure SI4.** SAED pattern of the calcined Au@TiO<sub>2</sub> (n) material.
